# Supplementary material for: A non-canonical role for the proneural geneNeurog1as a negative regulator of neocortical neurogenesis
Source: Oxford University Press journal article supplement (doi:10.1242/dev.157719), 2018-01-01
Supplement: dev157719supp.pdf [file dev157719supp.pdf]

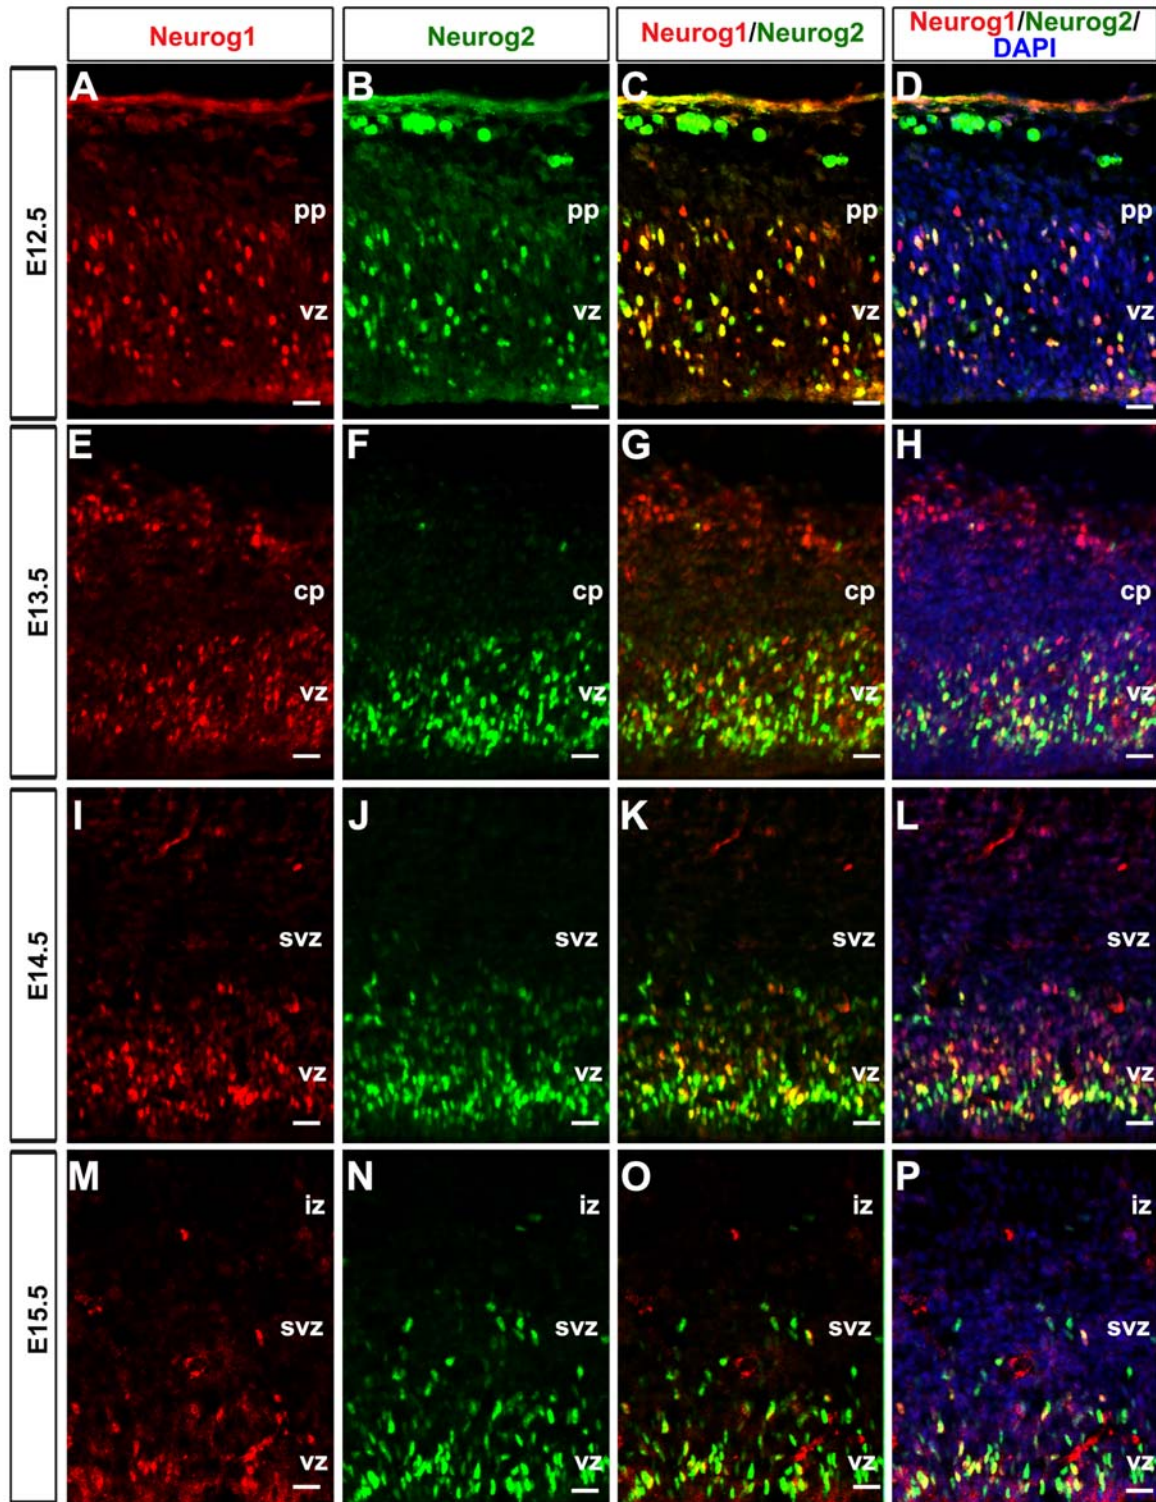

**Figure S1. Co-expression of Neurog1 and Neurog2 in the developing neocortex.**

Co-expression of Neurog1 (A,E,I,M), Neurog2 (B,F,J,N), and merged images without (C,G,K,O) and with (D,H,L,P) DAPI. CP, cortical plate; IZ, intermediate zone; SVZ, subventricular zone; VZ, ventricular zone. Scale bar = 50  $\mu$ m.

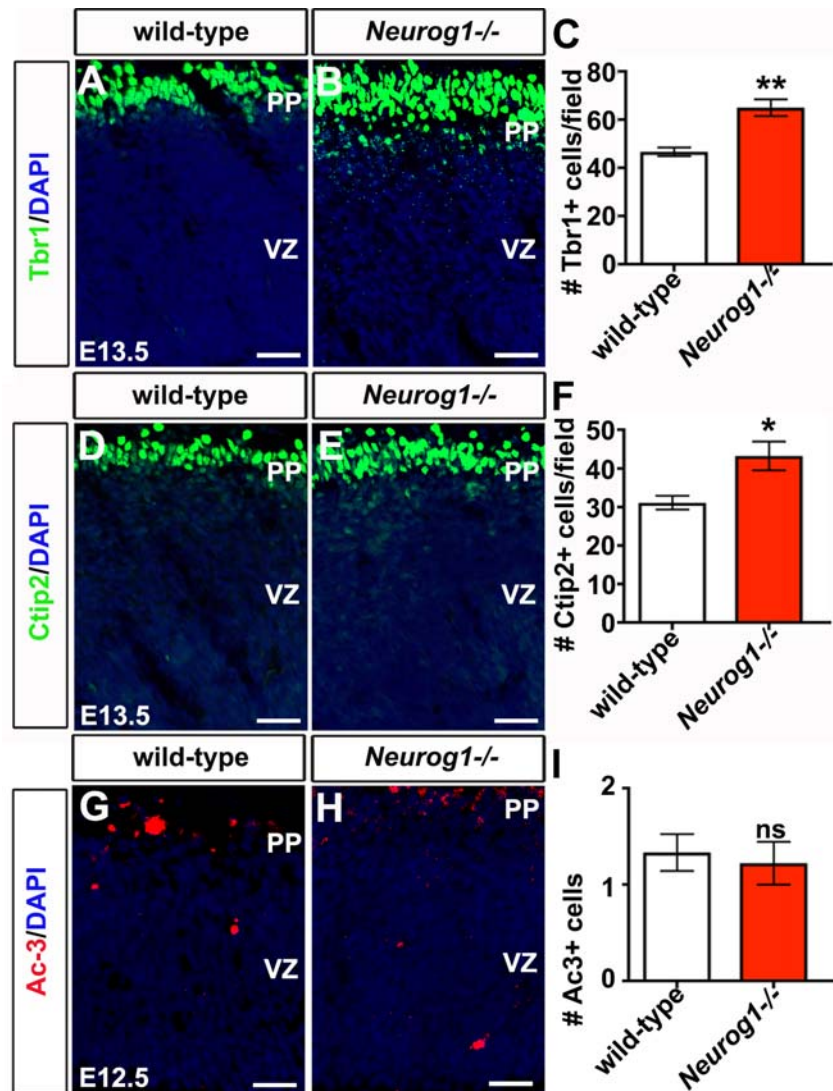

**Figure S2. Increased deep-layer neurogenesis in E13.5 *Neurog1*<sup>-/-</sup> cortices.**

Expression of Tbr1 (A,B), Ctip2 (D,E) and activated caspase 3 (Ac-3) (G,H) in E13.5 wild-type (A,D,G) and *Neurog1*<sup>-/-</sup> (B,E,H) cortices. Quantitation of Tbr1<sup>+</sup> (C), Ctip2<sup>+</sup> (F) and Ac-3<sup>+</sup> (I) cells per field of view (N=3, n=9, unpaired *t*-test). Data are represented as mean  $\pm$  s.e.m.. n = 3, p values are denoted as follows: p < 0.05 \*, < 0.01 \*\*, < 0.001\*\*\*. PP, preplate; VZ, ventricular zone. Scale bars = 75  $\mu$ m.

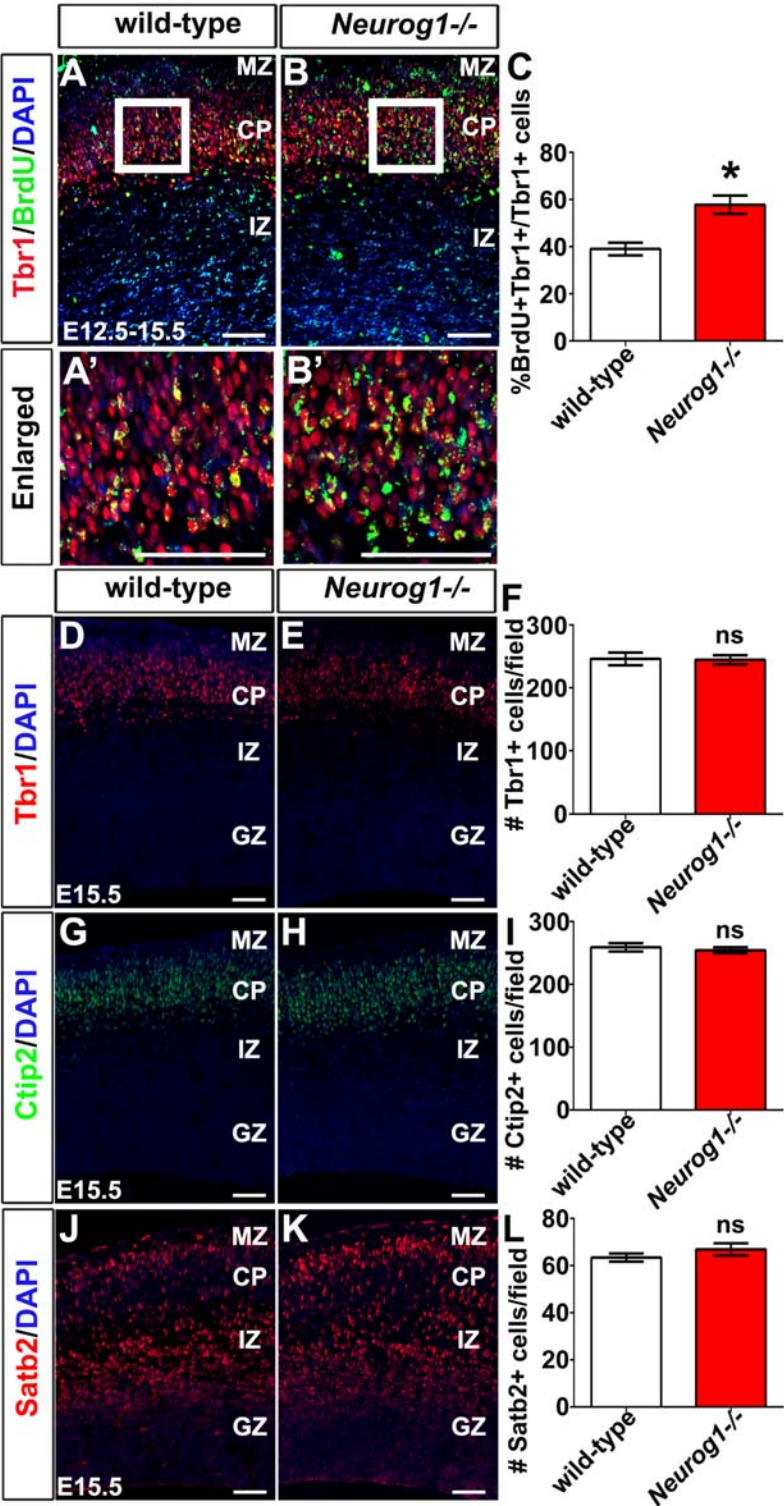



**Figure S3. Neurogenesis is increased in early and not late embryonic *Neurog1*<sup>-/-</sup> cortices.** (A-C) Co-localization of Tbr1 and BrdU in E13.5 wild-type (A,A') and *Neurog1*<sup>-/-</sup> (B,B') cortices after a 24 hr BrdU pulse. Quantitation of the co-localization of Tbr1 and BrdU (N=3, n=9; two-tailed t-test) (C). (D-L) Expression of Tbr1 (D,E), Ctip2 (G,H) and Satb2 (J,K) in E15.5 wild-type (D,G,J) and *Neurog1*<sup>-/-</sup> (E,H,K) cortices. Blue is DAPI counterstain. Quantitation of Tbr1<sup>+</sup> (F), Ctip2<sup>+</sup> (I), Satb2<sup>+</sup> (L) cells per field of view (N=3, n=9; two-tailed t-test). Data are represented as mean ± s.e.m.. p values are denoted as follows: p < 0.05 \*, < 0.01 \*\*, < 0.001\*\*\*. CP, cortical plate; IZ, intermediate zone; MZ, marginal zone; VZ, ventricular zone. Scale bars = 75 µm (A,A',B,B'), 100 µm (D,E,G,H,J,K).

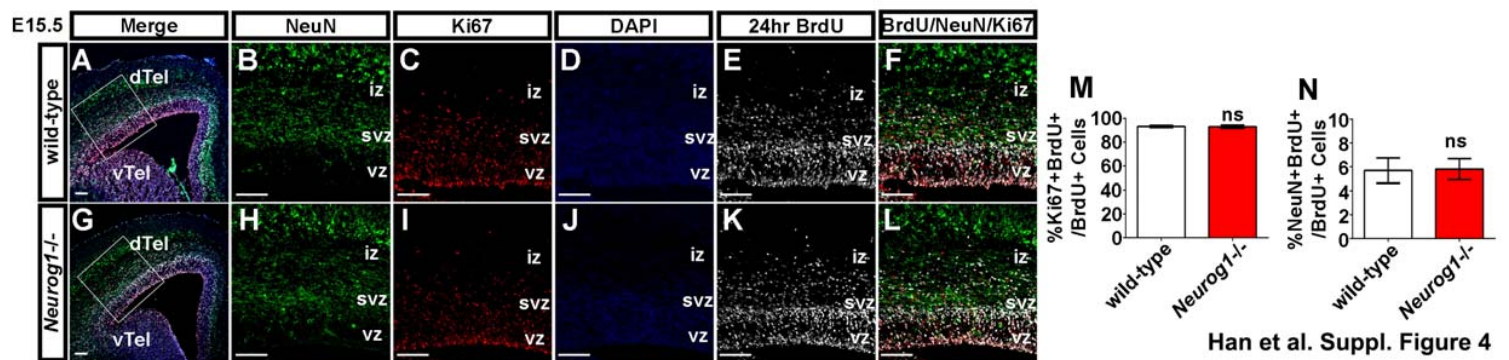

**Figure S4. No differences in the p-fraction and q-fraction in E15.5 *Neurog1*<sup>-/-</sup> cortices.**

Co-expression of NeuN (green, A,B,F,G,H,L), Ki67 (red, A,C,F,G,I,L) and co-localization of BrdU (white, A,E,F,G,K,L) and DAPI (blue, A,D,G,J) in E15.5 wild-type (A-F), and *Neurog1*<sup>-/-</sup> (G-L) cortices. (M) Quantitation of the leaving (q-) fraction, which is the proportion of BrdU-incorporating cells that co-localize with NeuN (N=3, n=9, two-tailed *t*-test). (N) Quantitation of the proliferative (p-) fraction, which is the proportion of BrdU-incorporating cells that co-localize with Ki67 (N=3, n=9, two-tailed *t*-test). Data are represented as mean  $\pm$  s.e.m.. *P* values are denoted as follows: *P* < 0.05 \*, < 0.01 \*\*, < 0.001\*\*\*. PP, preplate; VZ, ventricular zone. Scale bars = 100  $\mu$ m.

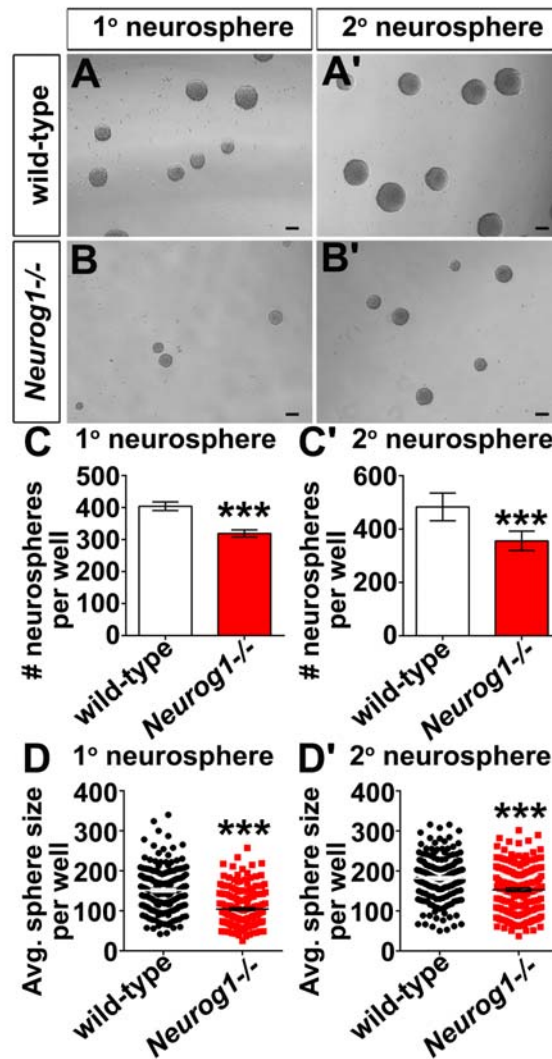

**Figure S5. *Neurog1*<sup>-/-</sup> cortical progenitors show reduced numbers and sizes of primary and secondary neurospheres.** (A-D') Primary (A,B) and secondary (A',B') neurospheres generated from wild-type and *Neurog1*<sup>-/-</sup> cortical progenitors. Quantitation of 1° (C) and 2° (C') neurosphere number per well (N=3, n=9, two-tailed t-test). Quantitation of average size of 1° (D) and 2° (D') neurospheres (N=3, n=180 spheres for both genotypes).

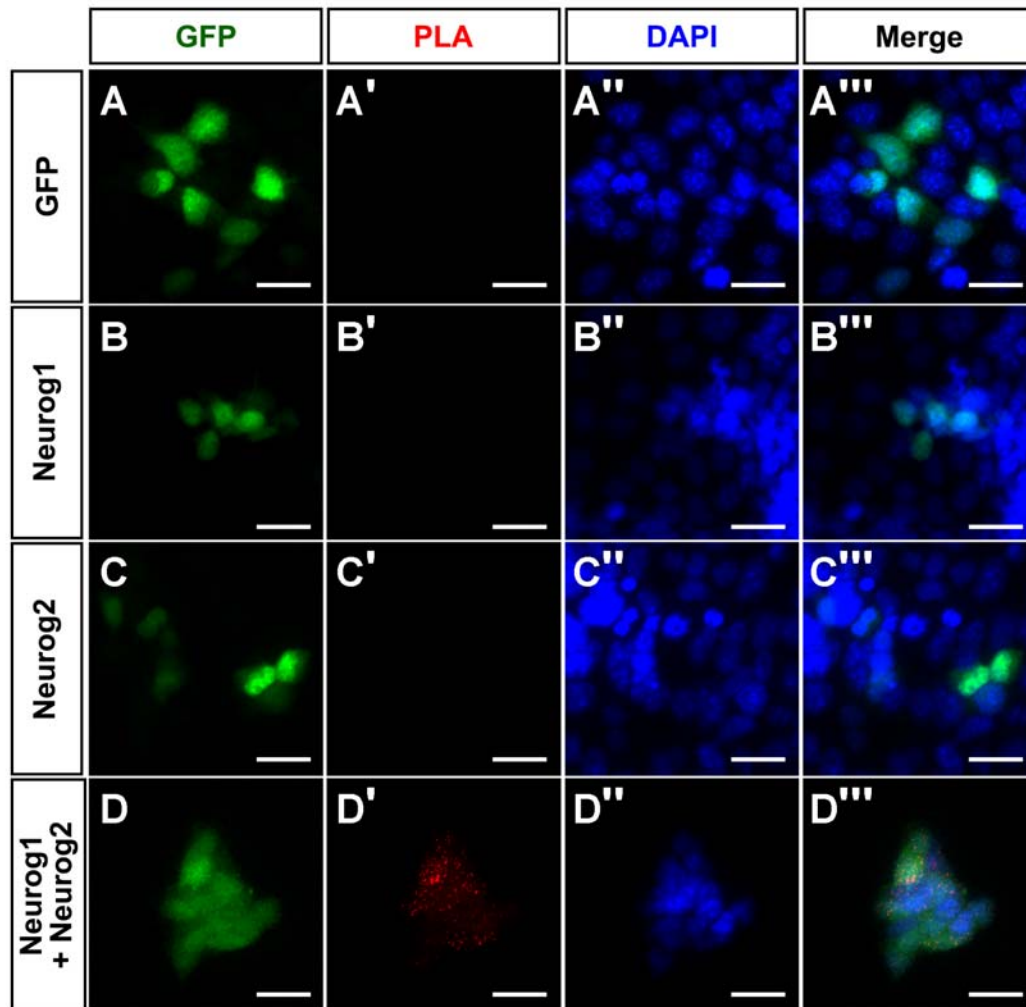

**Figure S6. PLA assay to show Neurog1 and Neurog2 interactions *in vitro*.** Immunostaining of NIH-3T3 cells 48 hr after co-transfection with pCIG2-*Neurog1* and pCIG2-*Neurog2*, using primary antibodies to GFP (A-A'''), Neurog1 (B-B'''), Neurog2 (C-C''') and Neurog1 and Neurog2 together (D-D'''), followed by PLA-conjugated secondary antibodies. GFP signal marks transfected cells (A-D), PLA signal marks cells with interacting proteins (A'-D'), DAPI marks all nuclei (A''-D'') and A'''-D''' are merged images. Scale bars = 25  $\mu$ m.

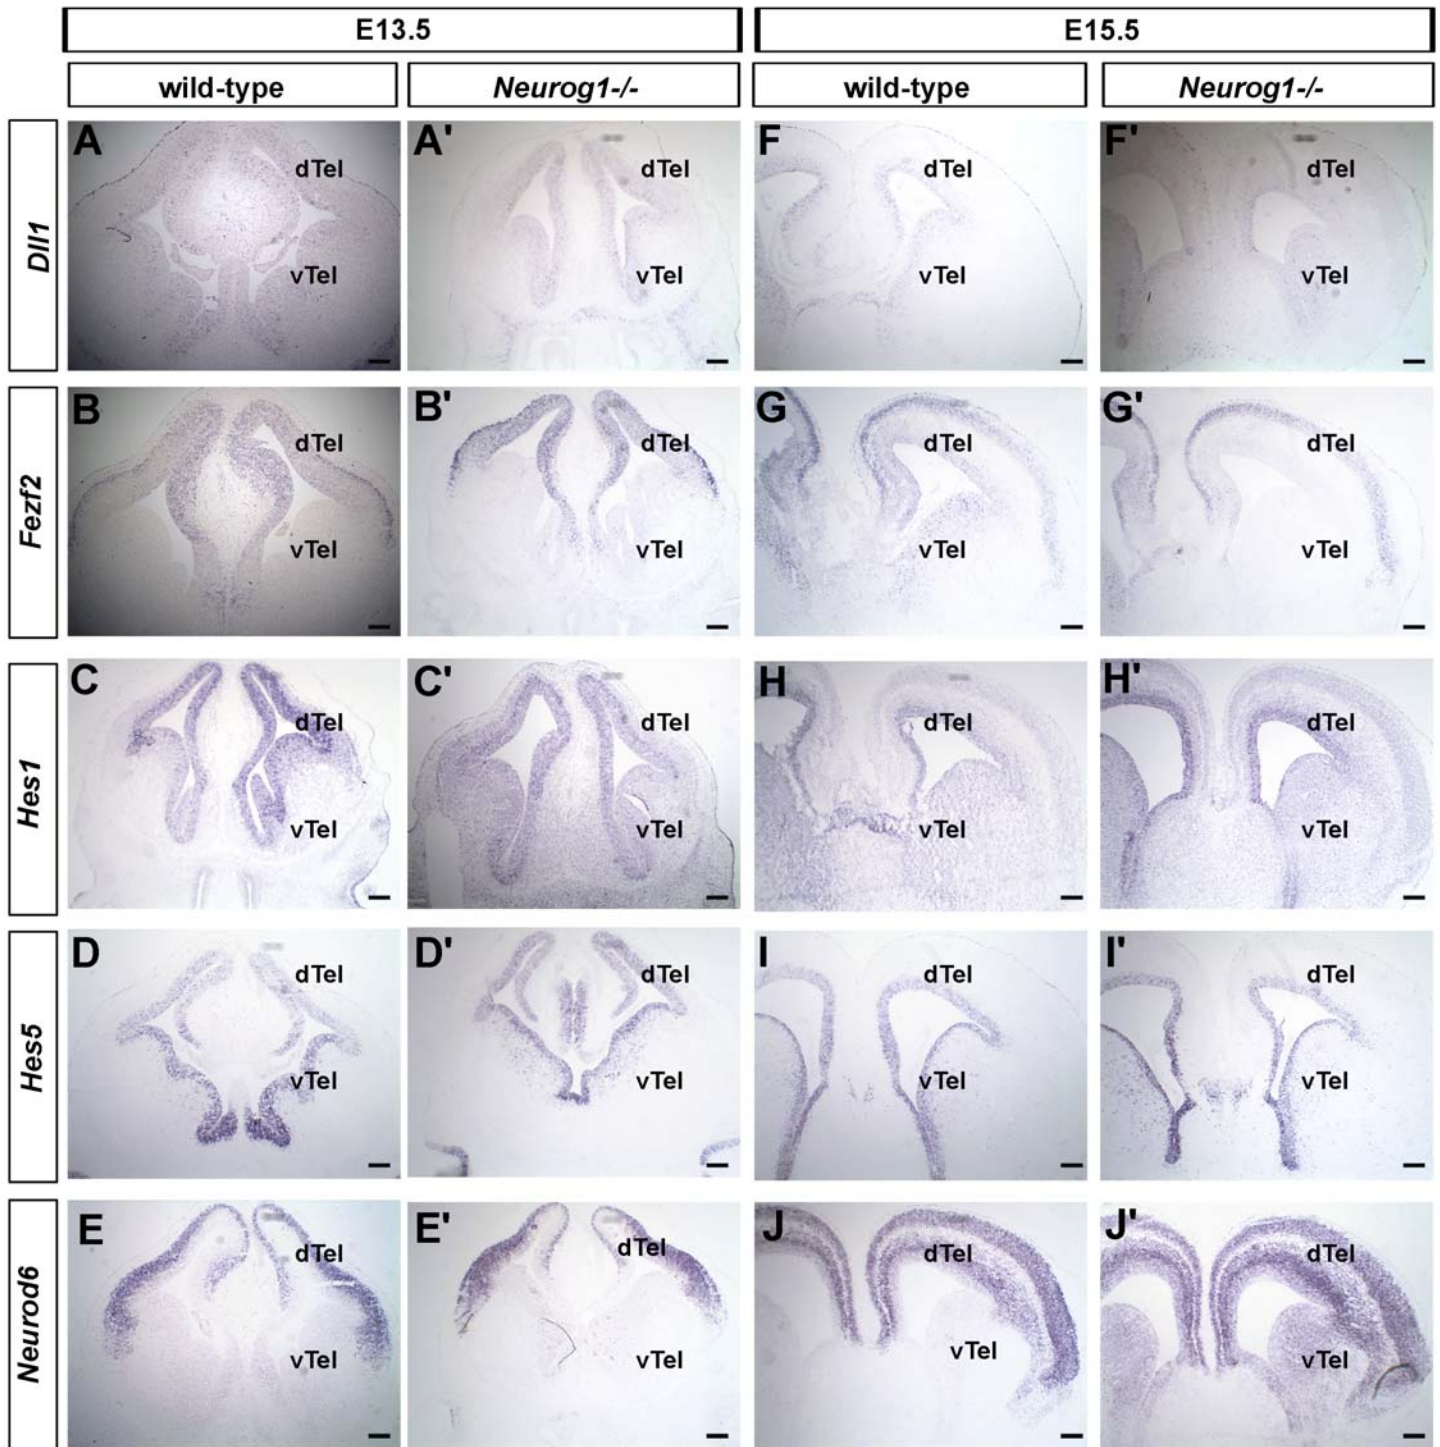

**Figure S7. Expression of *Neurog1*-regulated genes at E13.5 and E15.5.** (A-E) Expression of *Dll1* (A,A'), *Fezf2* (B,B'), *Hes1* (C,C'), *Hes5* (D,D') and *Neurod6* (E,E) in E13.5 wild-type (A-E) and *Neurog1*<sup>-/-</sup> (A'-E') telencephalons. (F-J) Expression of *Dll1* (F,F'), *Fezf2* (G,G'), *Hes1* (H,H'), *Hes5* (I,I') and *Neurod6* (J,J) in E13.5 wild-type (F-J) and *Neurog1*<sup>-/-</sup> (F'-J') telencephalons. dTel, dorsal telencephalon; vTel, ventral telencephalon. Scale bars= 100µm.
